# Supplementary material for: Spontaneous bimanual independence during parallel tapping and sawing
Source: PLoS One. 2017 May 25;12(5):e0178188. doi: 10.1371/journal.pone.0178188 (PMC5444785; doi:10.1371/journal.pone.0178188)
Supplement: S1 Data — (XLSX) [file pone.0178188.s001.xlsx]

## Sheet: Legend
Data for Starke and Baber: Spontaneous bimanual independence during parallel tapping and sawing
Legend
	Abbreviation	Explanation	Units
	Saw_single	Single hand task without metronome: sawing	s
	Saw_synch	Dual task: synchronous, data for sawing	s
	Saw_43	Dual task: 4(saw):3(tap) ratio, data for sawing	s
	Saw_34	Dual task: 3(saw):4(tap) ratio, data for sawing	s
	Saw_free	Dual task: free movement without metronome, data for sawing	s
	Tap_single	Single hand task without metronome: tapping	s
	Tap_synch	Dual task: synchronous, data for tapping	s
	Tap_43	Dual task: 4(saw):3(tap) ratio, data for tapping	s
	Tap_34	Dual task: 3(saw):4(tap) ratio, data for tapping	s
	Tap_free	Dual task: free movement without metronome, data for tapping	s
	Ratio_synch	Ratio of tapping divided by sawing, synchronous condition	dimensionless
	Ratio_43	Ratio of tapping divided by sawing, 4(saw):3(tap) condition	dimensionless
	Ratio_34	Ratio of tapping divided by sawing, 3(saw):4(tap) condition	dimensionless
	Ratio_free	Ratio of tapping divided by sawing, free movement condition	dimensionless
	Expect_synch	Expected ratio for the synchronous condition	dimensionless
	Expect_43	Expected ratio for the 4(saw):3(tap) condition	dimensionless
	Expect_34	Expected ratio for the 3(saw):4(tap) condition	dimensionless
	Expect_free	Expected ratio for the free movement condition	dimensionless
	Met_synch	Metronome beat for the synchronous condition	s
	Met_43	Metronome beat for the 4(saw):3(tap) condition	s
	Met_34	Metronome beat for the 3(saw):4(tap) condition	s

## Sheet: Participant-specific MEDIAN
Data for Starke and Baber: Spontaneous bimanual independence during parallel tapping and sawing
Participant-specific median values (for estimates of centrality)
		Sawing cycle duration (s)					Tapping cycle duration (s)					Observed ratios				Expected ratios				Metronome beat (s)
	Participant	Saw_single	Saw_synch	Saw_43	Saw_34	Saw_free	Tap_single	Tap_synch	Tap_43	Tap_34	Tap_free	Ratio_synch	Ratio_43	Ratio_34	Ratio_free	Expect_synch	Expect_43	Expect_34	Expect_free	Met_synch	Met_43	Met_34
	1	0.55	0.55	0.43	0.46	0.53	0.47	0.55	0.42	0.71	0.68	1.01	0.97	1.53	1.27	1	0.75	1.33	1	0.58	0.43	0.75
	2	0.53	0.5	0.59	0.52	0.52	0.48	0.44	0.31	0.53	0.53	0.88	0.52	1.02	1.02	1	0.75	1.33	1	0.43	0.33	0.57
	3	0.79	0.93	0.63	0.82	0.57	0.57	0.55	0.5	0.85	0.52	0.58	0.79	1.04	0.9	1	0.75	1.33	1	0.71	0.54	0.95
	4	0.4	0.46	0.41	0.53	0.34	0.29	0.33	0.31	0.47	0.23	0.71	0.76	0.89	0.68	1	0.75	1.33	1	0.38	0.29	0.5
	5	0.78	0.38	0.33	0.35	0.61	0.54	0.76	0.55	1	0.6	2.02	1.65	2.84	0.98	1	0.75	1.33	1	0.79	0.58	1.03
	6	0.66	0.68	0.47	0.92	0.51	0.44	0.62	0.47	0.84	0.47	0.91	1.01	0.92	0.92	1	0.75	1.33	1	0.65	0.5	0.87
	7	0.47	0.68	0.64	0.64	0.69	0.45	0.45	0.34	0.35	0.43	0.67	0.53	0.54	0.62	1	0.75	1.33	1	0.48	0.36	0.63
	8	0.24	0.3	0.23	0.33	0.28	0.16	0.28	0.18	0.31	0.25	0.92	0.79	0.95	0.91	1	0.75	1.33	1	0.29	0.18	0.33
	9	0.71	0.66	0.51	0.59	0.58	0.68	0.65	0.51	0.88	0.84	0.99	1	1.49	1.45	1	0.75	1.33	1	0.71	0.54	0.95
	10	0.49	0.47	0.34	0.44	0.41	0.48	0.47	0.35	0.6	0.48	1.02	1.02	1.36	1.18	1	0.75	1.33	1	0.5	0.38	0.65
	11	0.36	0.62	0.47	0.66	0.53	0.55	0.33	0.28	0.45	0.53	0.52	0.6	0.68	1.01	1	0.75	1.33	1	0.36	0.29	0.48
	12	0.35	0.43	0.39	0.42	0.49	0.72	0.33	0.28	0.46	0.5	0.78	0.7	1.1	1.02	1	0.75	1.33	1	0.36	0.29	0.48
	13	0.51	0.49	0.56	0.63	0.53	0.35	0.47	0.38	0.66	0.52	0.97	0.69	1.05	0.98	1	0.75	1.33	1	0.5	0.38	0.68
	14	0.45	0.66	0.72	0.41	0.44	0.63	0.44	0.33	0.57	0.3	0.67	0.45	1.39	0.68	1	0.75	1.33	1	0.45	0.34	0.6
	15	0.32	0.36	0.49	0.35	0.32	0.59	0.31	0.24	0.41	0.95	0.86	0.49	1.17	2.99	1	0.75	1.33	1	0.33	0.5	0.43
	16	0.38	0.42	0.62	0.43	0.97	1.05	0.34	0.28	0.44	0.57	0.8	0.45	1.02	0.59	1	0.75	1.33	1	0.36	0.29	0.48
	17	0.28	0.4	0.34	0.41	0.33	0.39	0.27	0.23	0.34	0.26	0.67	0.68	0.84	0.79	1	0.75	1.33	1	0.29	0.21	0.38
	18	0.31	0.3	0.47	0.4	0.38	0.31	0.29	0.24	0.39	0.22	0.97	0.52	0.98	0.57	1	0.75	1.33	1	0.31	0.24	0.42
	19	0.46	1.1	1.72	1.3	1.5	0.37	0.43	0.33	0.57	0.41	0.39	0.19	0.44	0.27	1	0.75	1.33	1	0.45	0.34	0.6
	20	0.7	0.75	0.26	0.44	0.5	0.37	0.63	0.49	0.85	0.5	0.83	1.86	1.93	0.99	1	0.75	1.33	1	0.68	0.52	0.91
	21	0.27	0.43	0.38	0.43	0.38	0.68	0.27	0.22	0.34	0.33	0.62	0.58	0.79	0.87	1	0.75	1.33	1	0.29	0.42	0.36
	22	0.38	0.38	0.47	0.46	0.42	0.33	0.37	0.28	0.48	0.4	0.98	0.59	1.05	0.96	1	0.75	1.33	1	0.39	0.29	0.52
	23	0.49	0.94	0.71	0.42	0.62	0.54	0.45	0.34	0.62	0.31	0.47	0.48	1.46	0.5	1	0.75	1.33	1	0.5	0.38	0.65

## Sheet: Participant-specific IQR
Data for Starke and Baber: Spontaneous bimanual independence during parallel tapping and sawing
Participant-specific IQR values (for estimates of within-participant variation)
		Sawing cycle duration (s)					Tapping cycle duration (s)
	Participant	Saw_single	Saw_synch	Saw_43	Saw_34	Saw_free	Tap_single	Tap_synch	Tap_43	Tap_34	Tap_free
	1	0.04	0.05	0.04	0.05	0.04	0.02	0.04	0.03	0.11	0.06
	2	0.39	0.11	0.1	0.05	0.11	0.09	0.08	0.05	0.04	0.05
	3	0.14	0.31	0.06	0.23	0.07	0.06	0.15	0.05	0.18	0.08
	4	0.04	0.03	0.04	0.05	0.02	0.03	0.07	0.27	0.05	0.03
	5	0.04	0.03	0.03	0.03	0.03	0.03	0.05	0.06	0.15	0.05
	6	0.08	0.17	0.04	0.24	0.08	0.03	0.05	0.03	0.08	0.05
	7	0.02	0.21	0.06	0.06	0.09	0.01	0.08	0.07	0.07	0.07
	8	0.01	0.03	0.02	0.03	0.01	0.01	0.04	0.03	0.03	0.05
	9	0.04	0.09	0.09	0.17	0.06	0.04	0.1	0.06	0.23	0.11
	10	0.06	0.03	0.03	0.07	0.06	0	0.02	0.03	0.07	0.02
	11	0.11	0.4	0.13	0.26	0.08	0.08	0.04	0.07	0.03	0.04
	12	0.03	0.05	0.03	0.06	0.05	0.05	0.02	0.02	0.05	0.08
	13	0.05	0.11	0.13	0.11	0.04	0.03	0.06	0.14	0.06	0.08
	14	0.02	0.09	0.15	0.09	0.05	0.02	0.04	0.03	0.06	0.04
	15	0.02	0.03	0.15	0.06	0.04	0.03	0.04	0.07	0.06	0.07
	16	0.1	0.05	0.09	0.06	0.44	0.06	0.06	0.07	0.08	0.09
	17	0.02	0.1	0.05	0.05	0.04	0.02	0.07	0.05	0.11	0.09
	18	0.02	0.06	0.06	0.03	0.03	0.08	0.07	0.09	0.08	0.07
	19	0.05	0.34	0.23	0.8	0.44	0.02	0.09	0.06	0.05	0.14
	20	0.05	0.29	0.49	0.09	0.03	0.06	0.08	0.06	0.12	0.05
	21	0.02	0.02	0.04	0.05	0.03	0.07	0.05	0.14	0.07	0.06
	22	0.02	0.03	0.08	0.06	0.02	0.06	0.09	0.12	0.11	0.09
	23	0.04	0.13	0.05	0.05	0.05	0.08	0.14	0.08	0.1	0.05
